# Supplementary material for: Aberrant zinc binding to immature conformers of metal-free copper–zinc superoxide dismutase triggers amorphous aggregation
Source: Royal Society of Chemistry journal article supplement (doi:10.1039/c4mt00278d), 2014-12-19
Supplement: c4mt00278d1.pdf [file c4mt00278d1.pdf]

## Aberrant zinc binding to immature conformers of metal-free copper-zinc superoxide dismutase triggers amorphous aggregation

Sónia S. Leal, Joana S. Cristóvão, Antje Biesemeier, Isabel Cardoso, Cláudio M. Gomes\*

### Supplemental Figures and Tables

**Figure S1: Comparative isothermal titration calorimetry analysis of Zn<sup>2+</sup> binding to dSOD1<sup>S-S</sup> at distinct concentrations.** Integrated data of raw heats of dilution obtained after subtracting the heat of dilution. See also Table S1. 20 μM (∇) and 80 μM (□) of dSOD1<sup>S-S</sup> at pH 7 and 37°C (see Materials and methods)

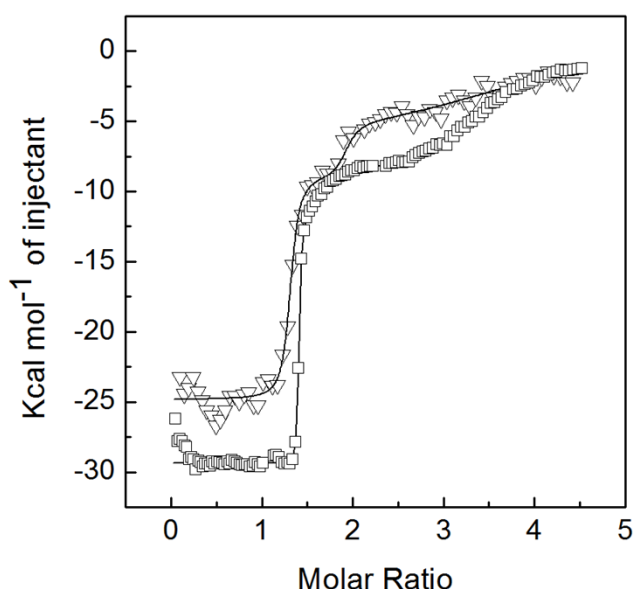

**Table S1: Estimated parameters of Zn<sup>2+</sup> binding to 20 μM of dSOD1<sup>S-S</sup> <sup>a</sup>**

|     | n           | K <sub>a</sub><br>(M <sup>-1</sup> ) | ΔH<br>(Kcal/mol <sup>-1</sup> ) | ΔG<br>(Kcal/mol <sup>-1</sup> ) | ΔS<br>(cal/mol <sup>-1</sup> /deg) |
|-----|-------------|--------------------------------------|---------------------------------|---------------------------------|------------------------------------|
| I   | 1.28 ± 0.02 | 1.2 × 10 <sup>10</sup>               | -24.0 ± 0.3                     | -14.3                           | 10.55                              |
| II  | 0.62 ± 0.10 | 3.9 × 10 <sup>7</sup>                | -9.0 ± 1.4                      | -10.8                           | -1.77                              |
| III | 1.94 ± 0.40 | 1.6 × 10 <sup>5</sup>                | -0.1 ± 2.9                      | -7.4                            | -1.30                              |

<sup>a</sup> Zn<sup>2+</sup> binding to dSOD1<sup>S-S</sup> (20 μM) in 50 mM TRIS pH 7.4 and 37°C. Apo SOD1 dimer contains 2 zinc-sites and 2 copper-sites, one per monomer. The roman numbering in the table refers to binding events associated with one Zn<sup>2+</sup> binding to the first zinc-site Zn1 (I), to one Zn<sup>2+</sup> binding to the second zinc-site in the apo dimer, Zn2 (II), and to binding of two Zn<sup>2+</sup> to the two copper-sites (Cu1 and Cu2) in the apo dimer.

**Figure S2: Impact of increasing  $Zn^{2+}$  concentration on dSOD1<sup>SS</sup> size distribution (A) and Z-average (B) of dSOD1<sup>SS</sup>.** Measurements were performed after 1h of incubation at 37°C. See “Materials and Methods” for further details. *Error bars, S.D*

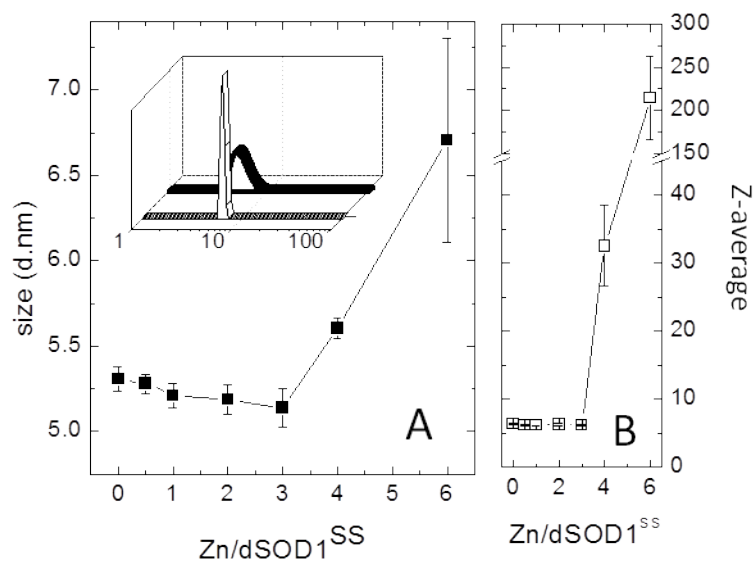

**Figure S3: ThT aggregation kinetics of dSOD1.** Black line – dSOD1 alone; dark grey - dSOD1 with addition of  $Zn^{2+}$  to a molar ratio of  $Zn^{2+}/dSOD1^{SS}=4$  at 10 minutes; light grey - dSOD1 with  $Zn^{2+}$  with addition of 10 mM of EDTA. Measurements were performed with 150  $\mu M$  of dSOD1<sup>SS</sup> at 37°C without agitation. See “Materials and Methods” for further details.

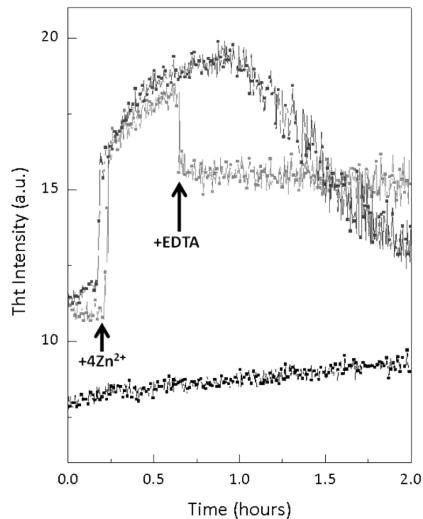

**Figure S4: Electron diffraction pattern of mSOD1<sup>SS</sup> and mSOD1<sup>SH</sup> with and without Zn<sup>2+</sup>.** Main reflections (black arrows) between 0.27 nm and 0.3 nm (second order) and at about 0.59 nm (first order); weaker reflections at 0.34 nm (white arrow); grey arrow heads label the 0.43 nm and 0.23 nm. -Zn<sup>2+</sup>, no ZnCl<sub>2</sub>; +Zn<sup>2+</sup>, ZnCl<sub>2</sub>/SOD1=4. See “Materials and Methods” for further details.

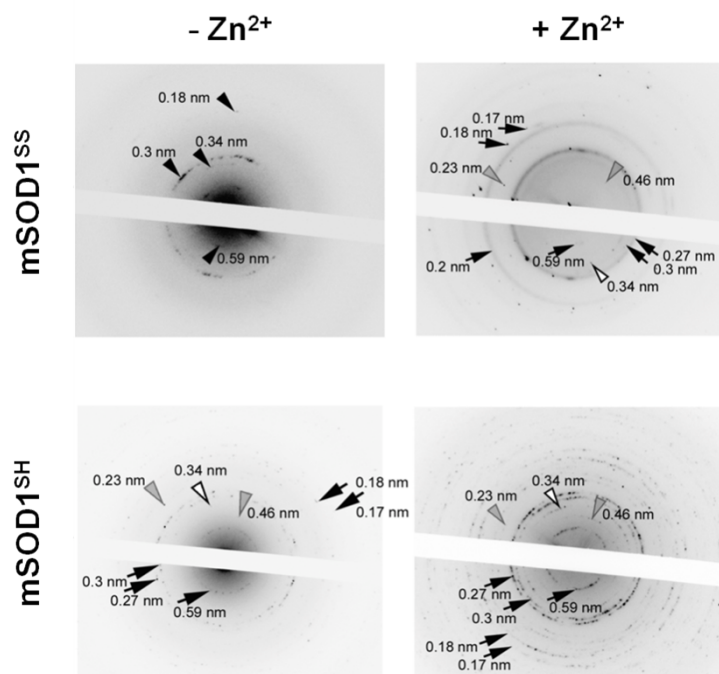

**Table S2: Qualitative analyses of diffraction pattern reflections of dSOD1<sup>SS</sup>, mSOD1<sup>SS</sup> and mSOD1<sup>SH</sup> with and without zinc.** ° 1-2 single reflections, + weak ring of reflections, ++ ring, +++ strong ring bold lines. See “Materials and Methods” for further details.

| Diameter (nm <sup>-1</sup> ) | d spacing (nm) | dSOD1 <sup>SS</sup> |                   | mSOD1 <sup>SS</sup> |                    | mSOD1 <sup>SH</sup> |                   |
|------------------------------|----------------|---------------------|-------------------|---------------------|--------------------|---------------------|-------------------|
|                              |                | -Zn <sup>2+</sup>   | +Zn <sup>2+</sup> | -Zn <sup>2+</sup>   | + Zn <sup>2+</sup> | -Zn <sup>2+</sup>   | +Zn <sup>2+</sup> |
| 3.4                          | 0.59           | ++                  | +++               | +++                 | +                  | +++                 | +++               |
| 4.4                          | 0.46           | °                   | +                 | -                   | °                  | °                   | °                 |
| 5.9                          | 0.34           | ++                  | ++                | ++                  | +                  | +                   | °                 |
| 6.7                          | 0.30           | +++                 | +++               | ++                  | ++                 | +++                 | +++               |
| 7.4                          | 0.27           | +++                 | +++               | +++                 | +++                | +++                 | +++               |
| 8.6                          | 0.23           | ++                  | °                 | -                   | +                  | +                   | +                 |
| 9.3                          | 0.22           | °                   | °                 | -                   | +                  | -                   | -                 |
| 10                           | 0.20           | ++                  | ++                | °                   | ++                 | +                   | +                 |
| 11                           | 0.18           | ++                  | ++                | ++                  | -                  | +                   | +                 |
| 12.1                         | 0.17           | ++                  | ++                | +                   | ++                 | +                   | °                 |
